# Supplementary material for: Primary Angiitis of the Central Nervous System: From Psychiatry to Neurology
Source: Hindawi journal article supplement (doi:10.1155/2019/8074258), 2019-10-31
Supplement: f1 [file 8074258.f1.pdf]

| <b>Author<br/>(Reference)</b> | <b>Gender/age</b> | <b>Clinic</b>                                               | <b>Imaging/Findings</b>                                                 | <b>Biopsy/<br/>Results</b>         | <b>Treatment</b>                           |
|-------------------------------|-------------------|-------------------------------------------------------------|-------------------------------------------------------------------------|------------------------------------|--------------------------------------------|
| 8                             | M/28 yrs          | Headache<br>Seizure<br>Hemiplegia                           | CA/vasculitis typical<br>changes                                        | No                                 | Steroid                                    |
|                               | F/16 yrs          | Fever<br>Dysphagia<br>Seizure                               | MRI/Thalamus<br>infarct                                                 | No                                 | Steroid                                    |
|                               | F/38 yrs          | Dysarthria<br>Ataxia<br>Quadriparesis                       | CA/negativ                                                              | Yes/<br>confirming<br>vasculitis   | Steroid                                    |
| 9                             | F/20 yrs          | Headache<br>Vomiting<br>Diplopia<br>Upper Motor<br>Symptoms | MRI/Supra-<br>inratentorial lesions                                     | Yes/<br>confirming<br>vasculitis   | Steroid<br>Cyclophosphamide<br>Azathioprin |
| 10                            | M/54 yrs          | Hemiparesis<br>Headache<br>Aphasia                          | MRI-A/vasculitis<br>typical changes                                     | Yes/<br>confirming<br>vasculitis   | Steroid<br>Cyclophosphamide                |
|                               | W/55 yrs          | Hemiparesis<br>Aphasia<br>Stupor                            | CA/Vasculitis<br>appearing changes                                      | Yes/<br>confirming<br>vasculitis   | Steroid                                    |
|                               | M/35 yrs          | Hemiparesis<br>Language<br>disorder                         | MRI/hyperintense<br>lesions in frontal<br>lobe, paraventricular<br>area | Yes/<br>confirming<br>vasculitis   | Steroid<br>Cyclophosphamide                |
| 11                            | M/42 yrs          | Stereotypic<br>tingling spells<br>in right hand             | Gradient echo<br>MRI/multiple<br>petechial<br>hemorrhages               | Yes/<br>confirming<br>vasculitis   | Steroid<br>Cyclophosphamide                |
| 12                            | F/ 70 yrs         | Confusion<br>Disorientation<br>Memory loss                  | CT/areas of cerebral<br>edema                                           | Autopsy<br>confirmed<br>vasculitis | Steroid                                    |

Table 1: Literature findings

Legend: M: Male; F: Female; CA: Cerebral angiography; MRI-A: MRI-Angiography; yrs: years
